# Supplementary material for: Effect of alkylthiophene spacers and fluorine on the optoelectronic properties of 5,10-bis(dialkylthien-2-yl)dithieno[2,3-d:2′,3′-d′]benzo[1,2-b:4,5-b′]dithiophene-alt-benzothiadiazole derivative copolymers
Source: Royal Society of Chemistry journal article supplement (doi:10.1039/c6ra28836g), 2017-01-01
Supplement: c6ra28836g1.pdf [file c6ra28836g1.pdf]

## Support Information

### **Effect of Alkylthiophene Spacers and Fluorination on the Optoelectronic Properties of 5,10-Bis(alkylthien-2-yl)dithieno[2,3-*d*:2',3'-*d'*]benzo[1,2-*b*:4,5-*b'*]dithiophene-*alt*-benzothiadiazole Derivatives Copolymers**

Pengzhi Guo,<sup>a</sup> Jingbiao Sun,<sup>a</sup> Shuo Sun,<sup>b</sup> Jianfeng Li,<sup>a</sup> Junfeng Tong,<sup>b</sup> Chuang Zhao,<sup>b</sup> Liangjian Zhu,<sup>a</sup> Peng Zhang,<sup>a</sup> Chunyan Yang,<sup>a</sup> Yangjun Xia<sup>a,c</sup>

<sup>a</sup>Key Lab of Optoelectronic Technology and Intelligent Control of Education Ministry, Lanzhou Jiaotong University, Gansu Province, Lanzhou, 730070, China.

<sup>b</sup>National Laboratory for Infrared Physics, Shanghai Institute of Technical Physics, Chinese Academy of Sciences, Shanghai 200083, China

<sup>c</sup>Centre for Polymers and Organic Solids, University of California, Santa Barbara, CA 93106-9510

# Contents

|                                                                                                                                                                  |    |
|------------------------------------------------------------------------------------------------------------------------------------------------------------------|----|
| 1. Thermogravimetric characteristics of the copolymers.....                                                                                                      | 3  |
| 2. Normalized absorption of the PDTBDT-BT and PDTBDT-FBT.....                                                                                                    | 3  |
| 3. Temperature-dependant photoluminescence spectra of the PDTBDT-DTBT and PDTBDT-DTFBT in dilute solution.....                                                   | 4  |
| 4. Temperature-dependant absorption spectra of the PDTBDT-DTBT and PDTBDT-DTFBT in film.....                                                                     | 5  |
| 5. Temperature-dependant photoluminescence spectra of the PDTBDT-DTBT and PDTBDT-DTBT and PDTBDT-DTFBT in films.....                                             | 6  |
| 6. Temperature-dependant absorption spectra of the PDTBDT-DTBT (a) and PDTBDT-DTFBT (b) in dilute solution.....                                                  | 7  |
| 7. Electrochemical characteristics of the PDTBDT-BT and PDTBT-FBT.....                                                                                           | 8  |
| 8 The method used to calculate the HOMO and LUMO levels for the polymers.....                                                                                    | 9  |
| 9. Optimized geometries of each trimer models (Top view, (a), Side view, (b)) and surface plots and energy levels of frontier orbitals (c) of PDTBDT-DTBT.....   | 10 |
| 10. Optimized geometries of each trimer models (Top view, (a), Side view, (b)) and surface plots and energy levels of frontier orbitals (c) of PDTBDT-DTFBT..... | 11 |
| 11. Optimized geometries of each trimer models and surface plots (a) and energy levels of frontier orbitals of PDTBDT-BT (b).....                                | 12 |
| 12. Optimized geometries of each trimer models and surface plots (a) and energy levels of frontier orbitals of PDTBDT-BT (b).....                                | 13 |
| 13. 2D-GIWAXs characteristics of the PDTBDT-DTBT.....                                                                                                            | 14 |
| 14. 2D GIWAXs characteristics of the PDTBDT-DTBT.....                                                                                                            | 15 |
| 15. $J^{0.5}-V$ characteristics of the copolymers in the hole-only devices with configuration of ITO/PEDOT: PSS/copolymers/Au.....                               | 17 |
| 16. AFM topography images of the PDTBDT-DTBT/PC <sub>71</sub> BM (a, without DIO, b with 3% DIO) with weight ratio of 1:2.....                                   | 18 |
| 17. AFM topography images of PDTBDT-DTFBT/PC <sub>71</sub> BM (a, without DIO, b with 3% DIO) with weight ratio of 1:2.....                                      | 19 |
| 18. Diagram of the energy levels of the copolymers and PC <sub>71</sub> BM and calculated $V_{oc}$ from empirical equation.....                                  | 20 |

1. Thermogravimetric characteristics of the copolymers.

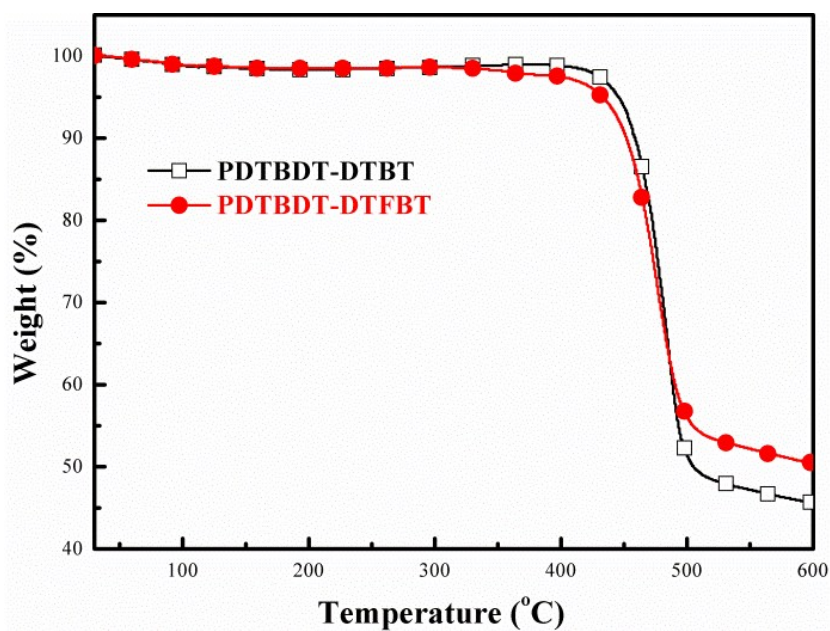

Fig. S1. Thermogravimetric curves of the copolymers.

2. Normalized absorption of the PDTBDT-BT and PDTBDT-FBT.

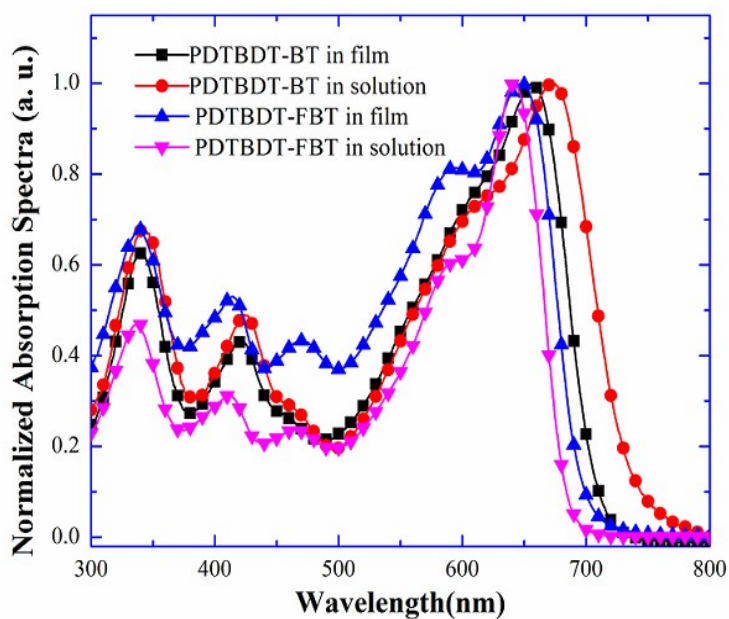

Fig. S2. Normalized absorption of PDTBDT-BT and PDTBDT-FBT in dilute solution and film.

3. Temperature-dependant photoluminescence spectra of the PDTBDT-DTBT and PDTBDT-DTFBT in dilute solution.

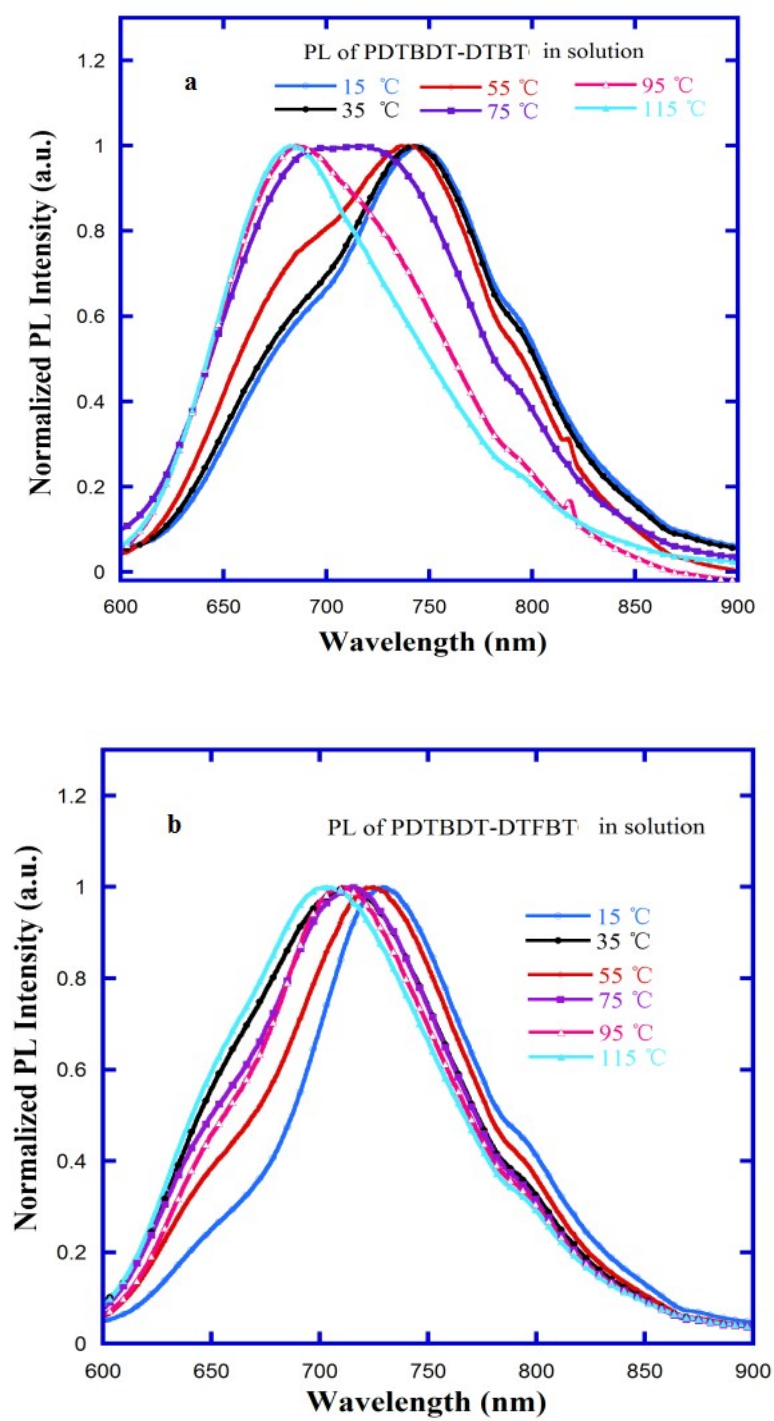

Fig. S3. Normalized temperature-dependent photoluminescence spectra of PDTBDT-DTBT (a) and PDTBDT-DTFBT (b) in dilute solution.

4. Temperature-dependant absorption spectra of the PDTBDT-DTBT and PDTBDT-DTFBT in film.

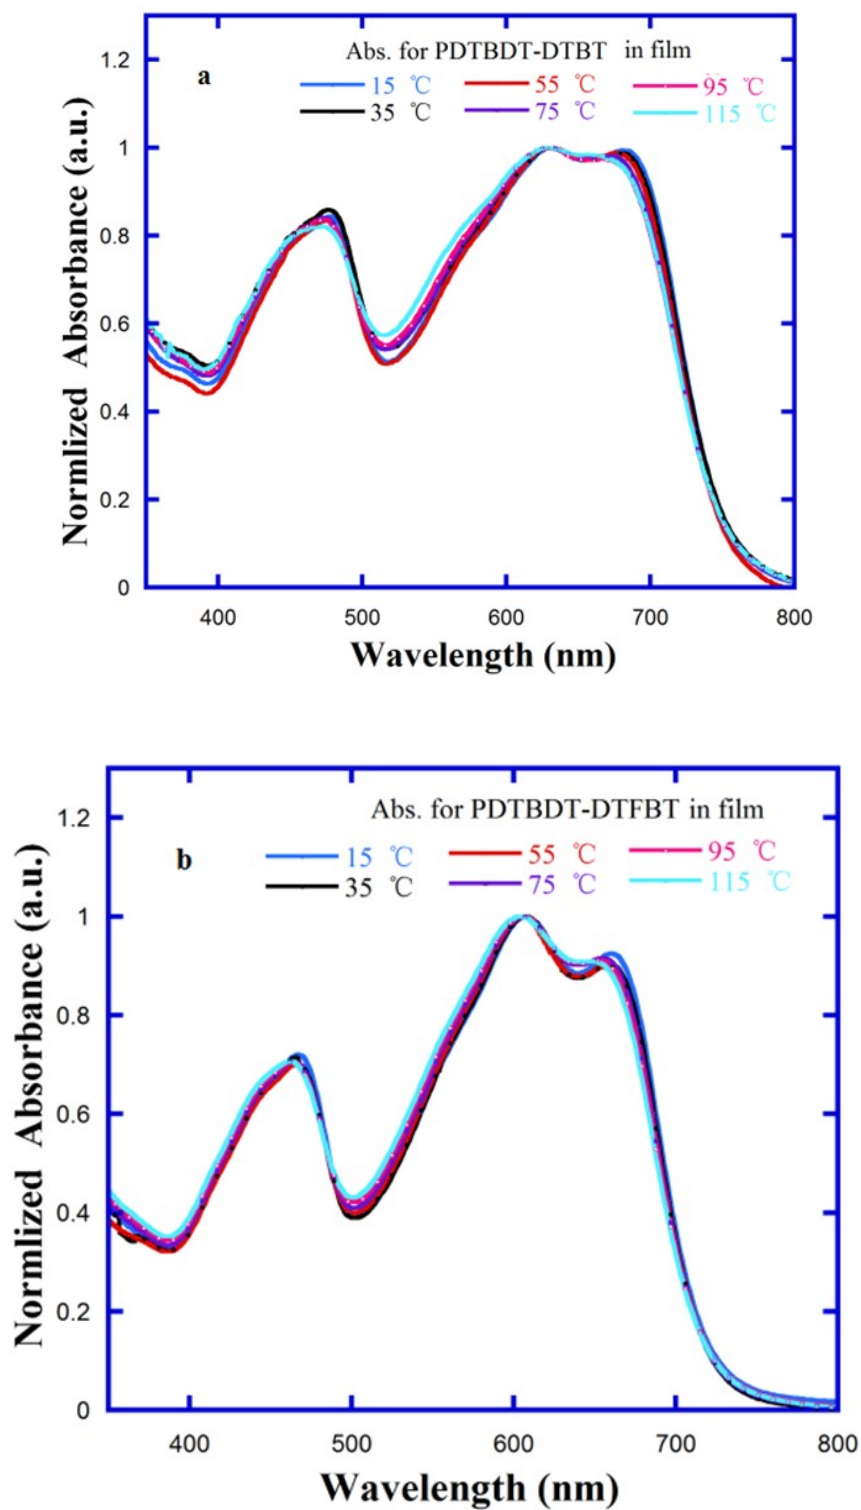

Fig. S4. Normalized temperature-dependent UV-vis spectra of PDTBDT-DTBT (a) and PDTBDT-DTFBT in solid states.

5. Temperature-dependant photoluminescence spectra of the PDTBDT-DTBT and PDTBDT-DTBT and PDTBDT-DTFBT in films.

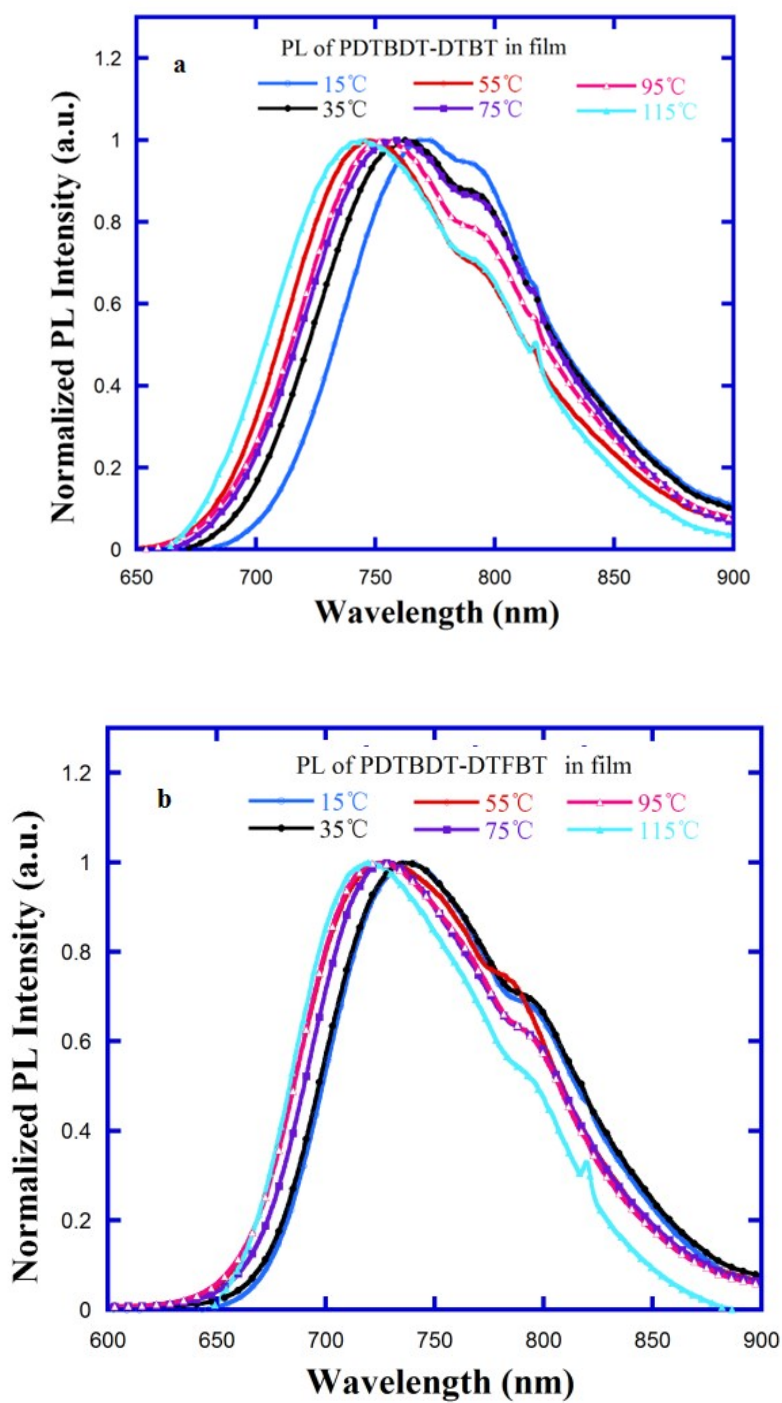

Fig. S5. Normalized temperature-dependent photoluminescence spectra of PDTBDT-DTBT (a) and PDTBDT-DTFBT (b) in solid states.

6. Temperature-dependant absorption spectra of the PDTBDT-DTBT (a) and PDTBDT-DTFBT (b) in dilute solution.

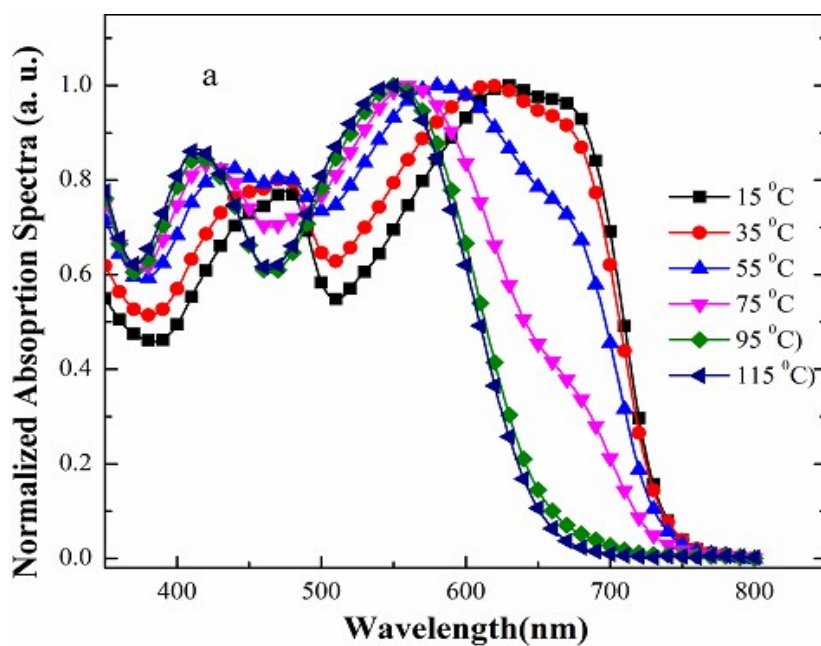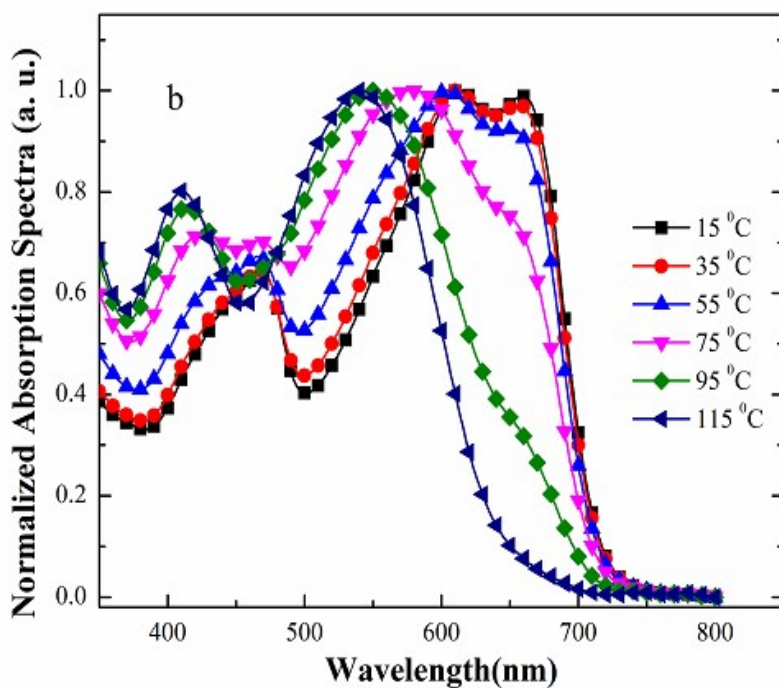

Fig. S6. Temperature-dependent UV-vis spectra of PDTBDT-DTBT (a) and PDTBDT-DTFBT (b) in chlorobenzene solution.



7. Electrochemical characteristics of the PDTBDT-BT and PDTBDT-FBT.

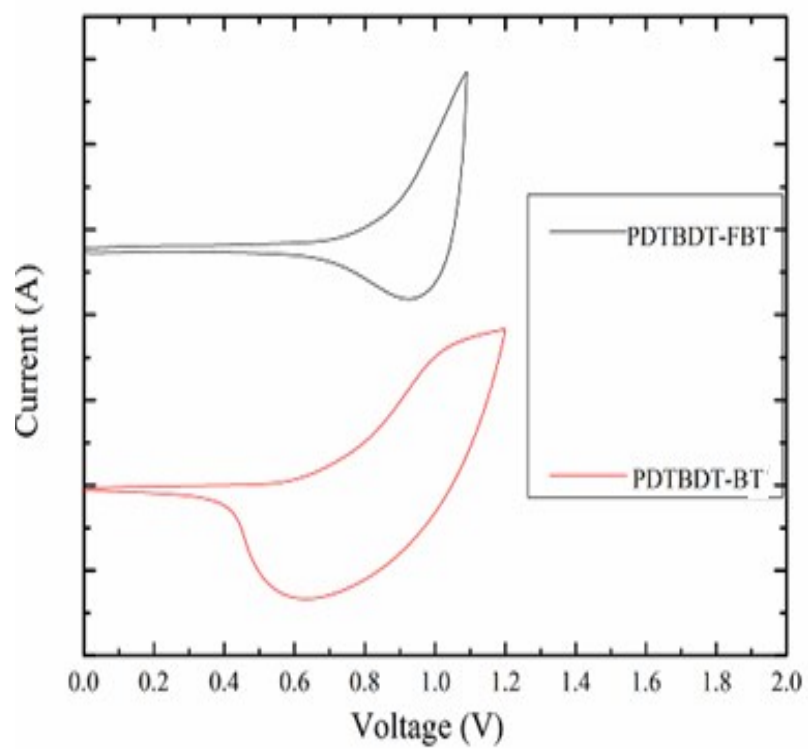

Fig. S7. Cyclic voltammety curves of PDTBDT-BT and PDTBDT-FBT measured in a nitrogen-saturated solution of 0.1 M tetrabutylammonium hexafluorophosphate in acetonitrile with glass carbon and Ag/AgNO<sub>3</sub> electrodes as the working and reference electrodes, respectively.



## 8 The method used to calculate the HOMO and LUMO levels for the polymers

Electrochemical cyclic voltammetry measurements were carried out using a CHI660 electrochemical workstation equipped with a glass carbon working electrode, Ag/AgNO<sub>3</sub> electrode as the reference electrode, and a Pt wire counter electrode. The measurements were done in anhydrous acetonitrile with tetrabutylammonium hexafluorophosphate (0.1 M) as the supporting electrolyte under an argon atmosphere at a scan rate of 50 mV/s. The potential of the Ag/AgNO<sub>3</sub> reference electrode was internally calibrated using the ferrocene/ferrocenium redox couple (Fc/Fc<sup>+</sup>), which has a known reduction potential of -4.8 eV. The HOMO and LUMO energy levels were calculated by the following equations.  $E_{\text{HOMO}} = -(E_{\text{ox}} + 4.71)$  (eV) and  $|E_{\text{LUMO}} = -(E_{\text{red}} + 4.71)$  (eV), the  $E_{1/2}$  of ferrocene/ferrocenium (Fc/Fc<sup>+</sup>) was observed at 0.09 V vs Ag/Ag<sup>+</sup>..

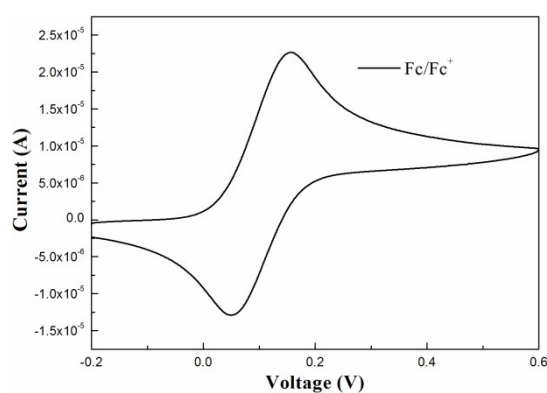

Figure S8. Electrochemical cyclic voltammetry curves of the Fc/Fc<sup>+</sup>.

9. Optimized geometries of each trimer models (Top view, (a), Side view, (b)) and surface plots and energy levels of frontier orbitals (c) of PDTBDT-DTBT.

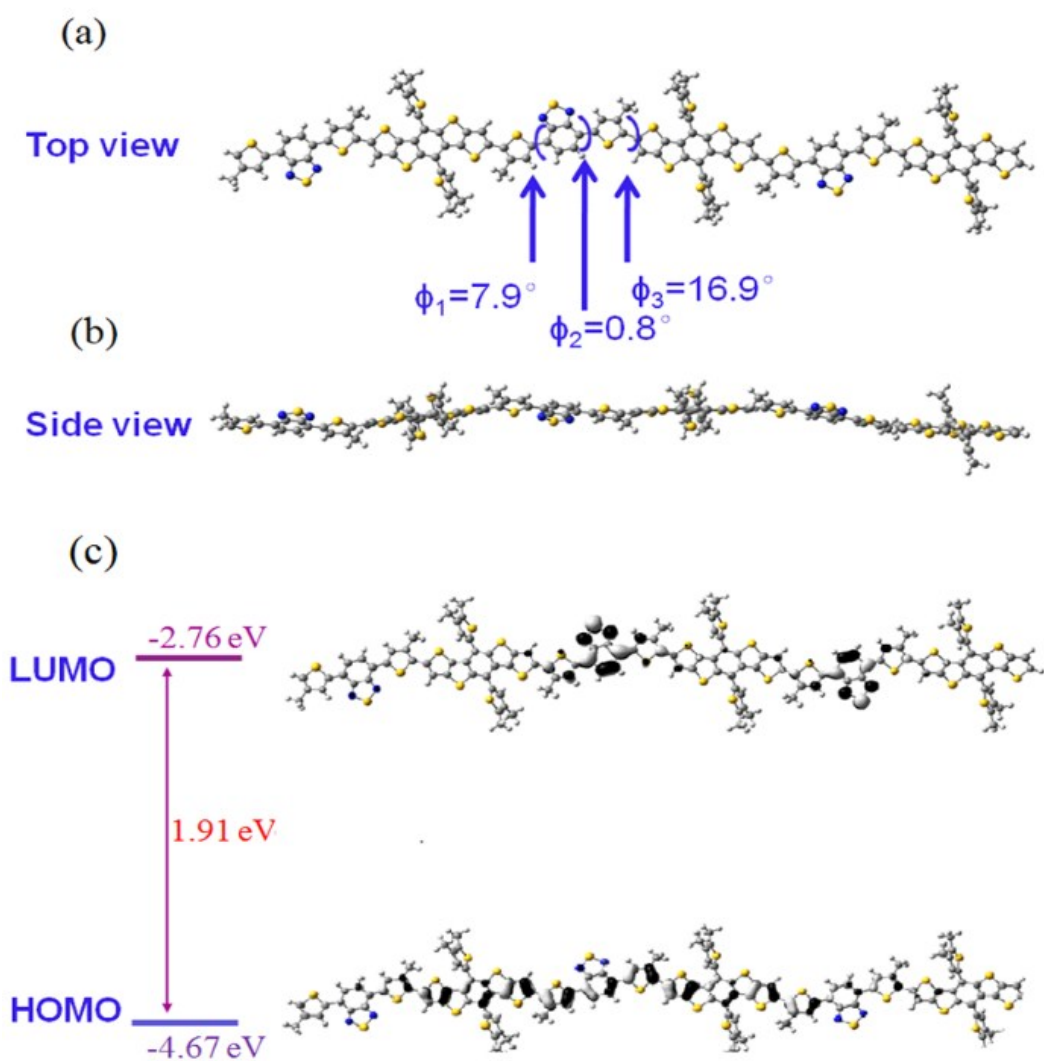

Fig. S9. Optimized geometries of each trimer models (Top view, (a), Side view, (b)) and surface plots and energy levels of frontier orbitals (c) of PDTBDT-DTBT.

10. Optimized geometries of each trimer models (Top view, (a), Side view, (b)) and surface plots and energy levels of frontier orbitals (c) of PDTBDT-DTFBT.

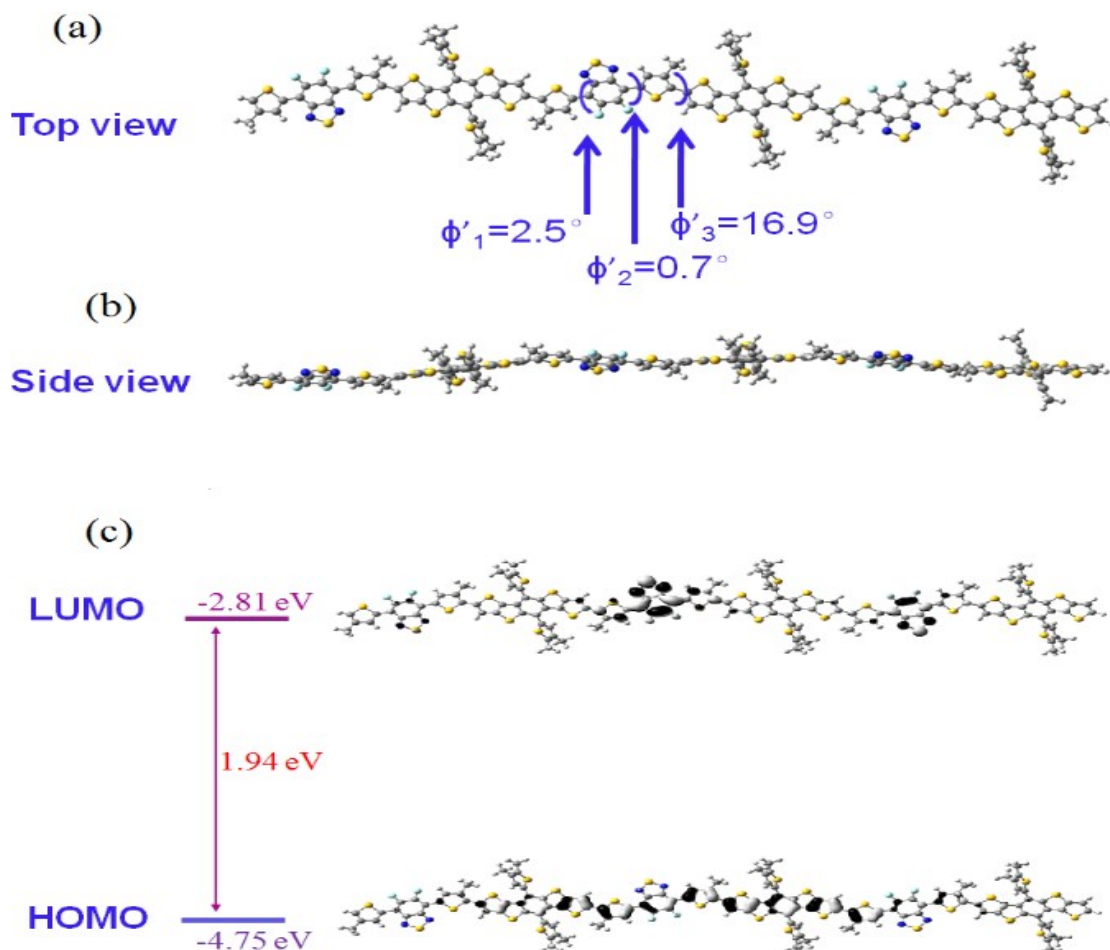

Fig. S10. Optimized geometries of each trimer models (Top view, (a), Side view, (b)) and surface plots and energy levels of frontier orbitals (c) of PDTBDT-DTFBT.

11. Optimized geometries of each trimer models and surface plots (a) and energy levels of frontier orbitals of PDTBDT-BT (b).

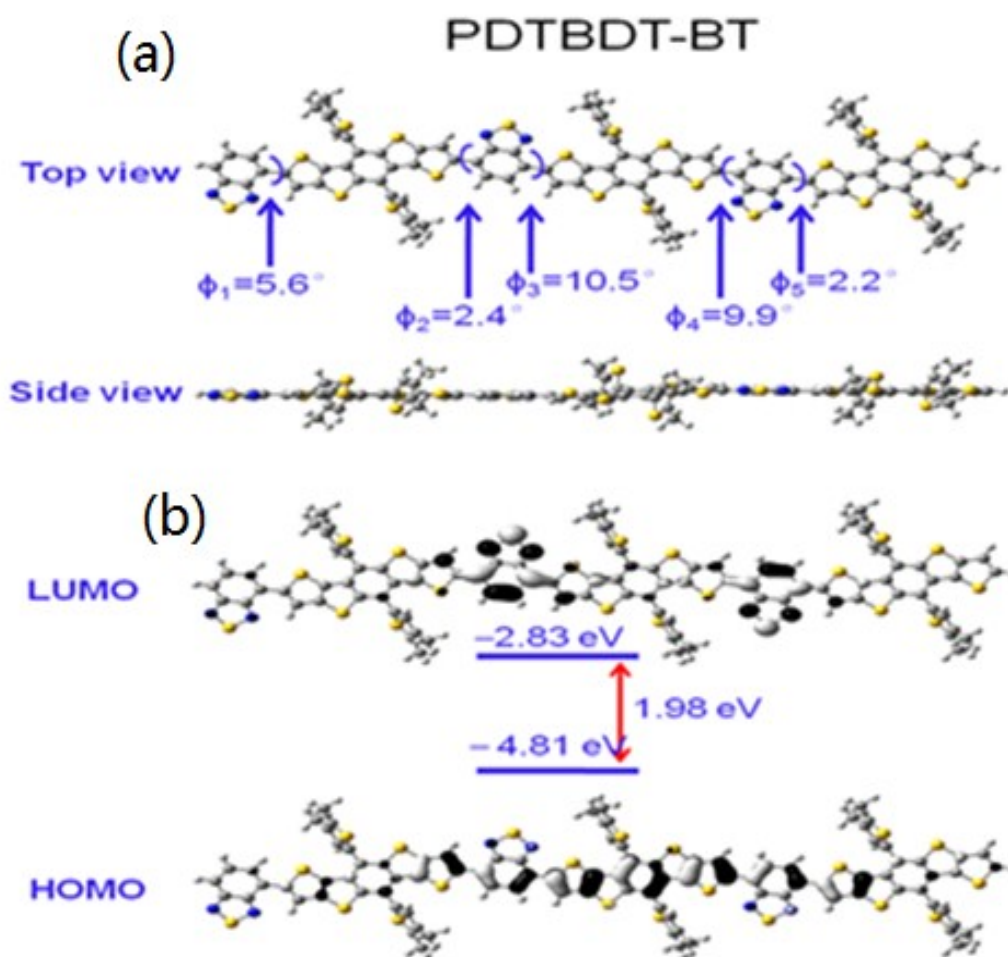

Fig. S11. Optimized geometries of each trimer models and surface plots (a) and energy levels of frontier orbitals of PDTBDT-BT (b).

12. Optimized geometries of each trimer models and surface plots (a) and energy levels of frontier orbitals of PDTBDT-FBT (b).

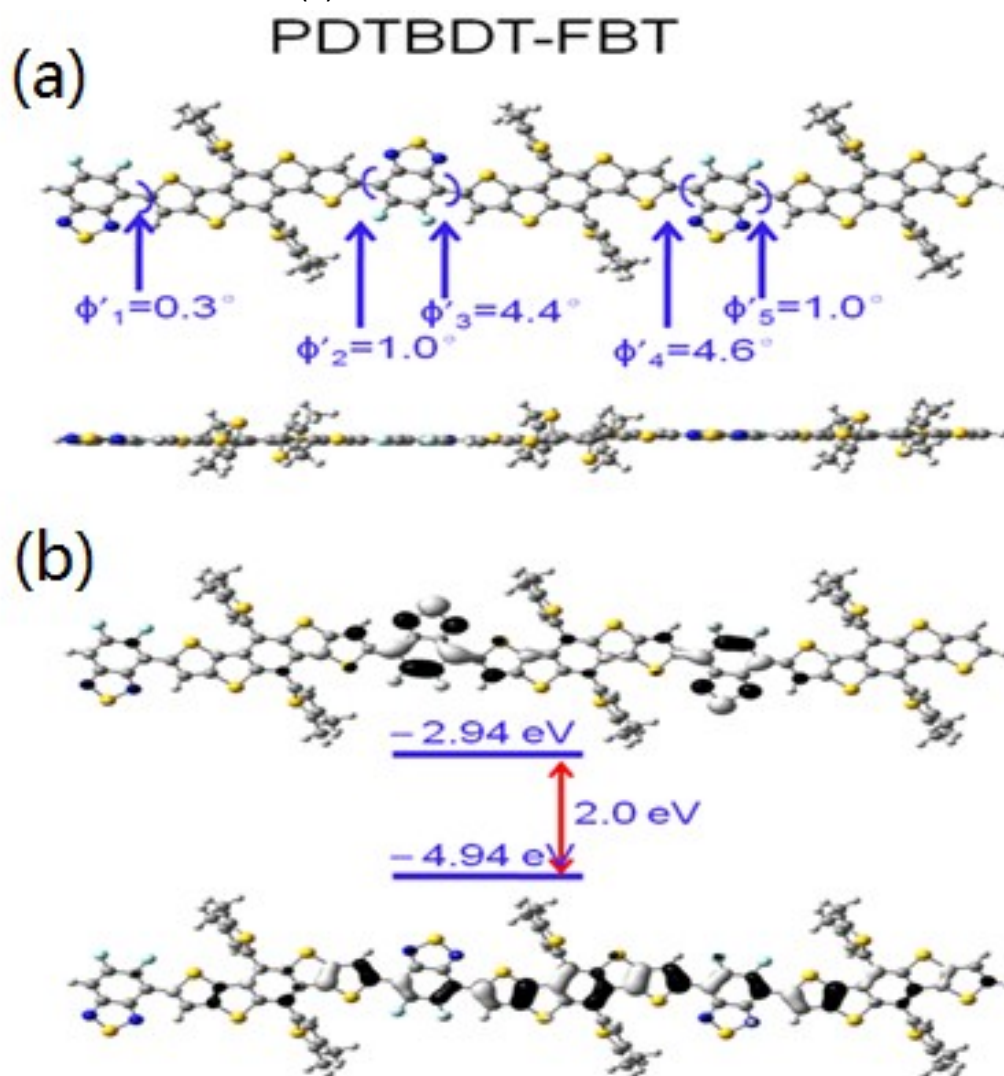

Figure S12. Optimized geometries of each trimer models (a) and surface plots and energy levels of frontier orbitals of PDTBDT-FBT (b).

### 13. 2D-GIWAXs characteristics of the PDTBDT-DTBT

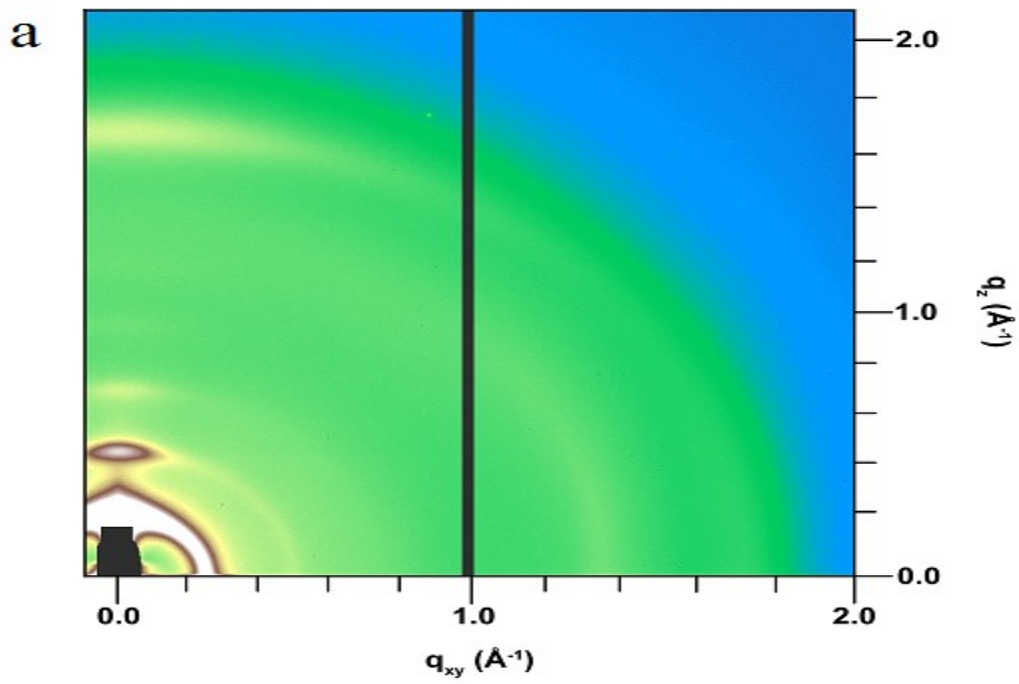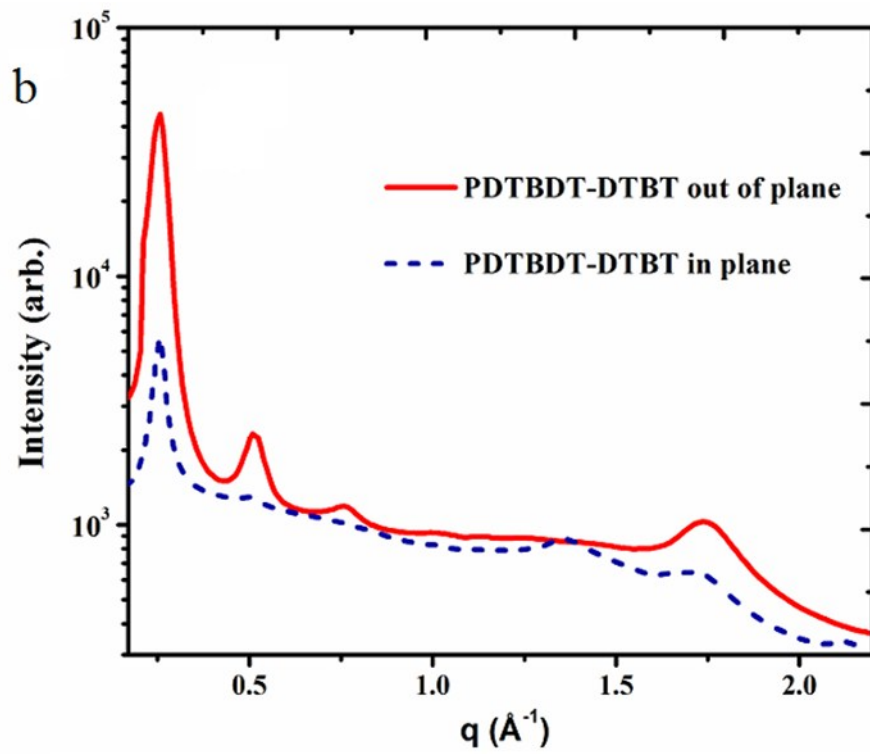

Fig. S13. 2D-GIWAXs patterns and corresponding out-of plane and in-plane line-cut profiles of PDTBDT-DTBT pristine film

14. 2D GIWAXs characteristics of the PDTBDT-DTBT

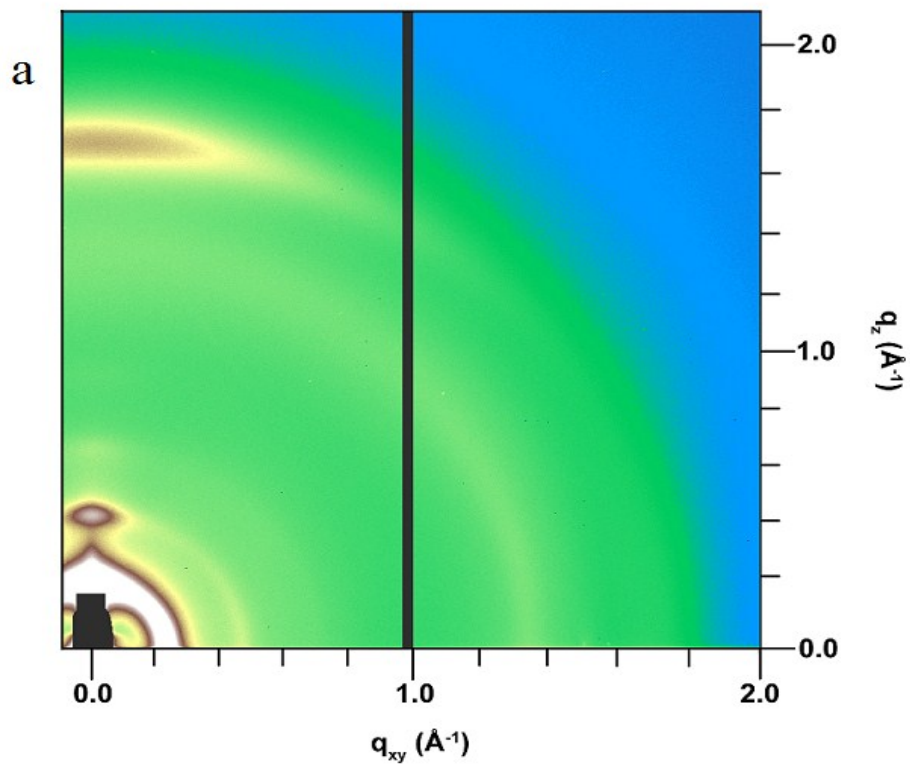



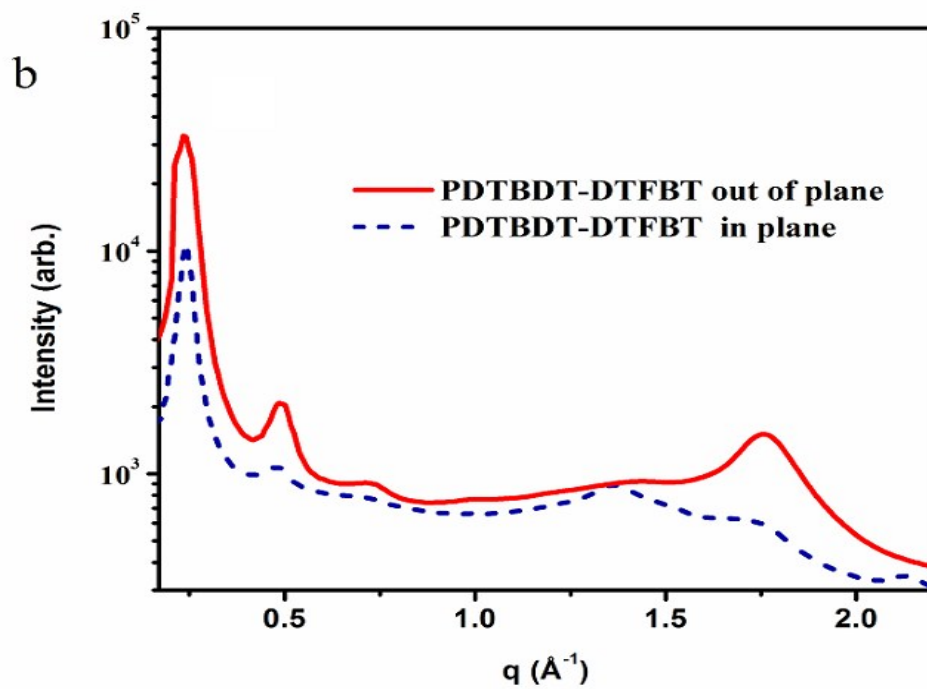

Fig. S14. 2D-GIWAXS patterns and corresponding out-off plane and in-plane line-cut profiles of PDTBDT-DTFBT pristine film

15.  $J^{0.5}$ - $V$  characteristics of the copolymers in the hole-only devices with configuration of ITO/PEDOT: PSS/copolymers/Au.

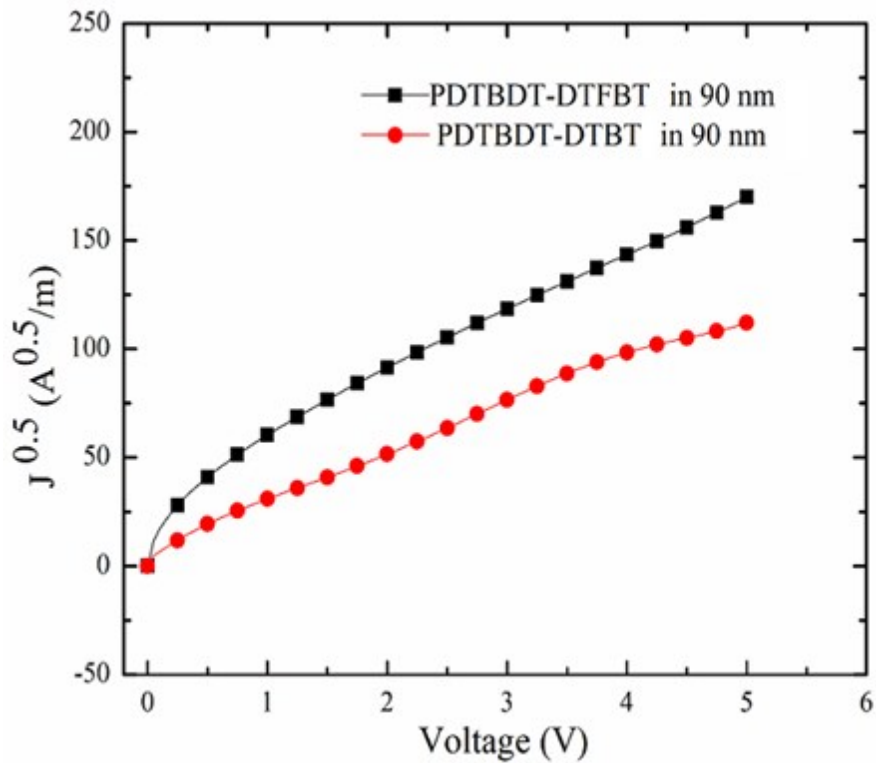

Fig. S15.  $J^{0.5}$ - $V$  characteristics of the copolymers in the hole-only devices with configuration of ITO/PEDOT: PSS/copolymers/Au.

16. AFM topography images of the PDTBDT-DTBT/PC<sub>71</sub>BM (a, without DIO, b with 3% DIO) with weight ratio of 1:2.

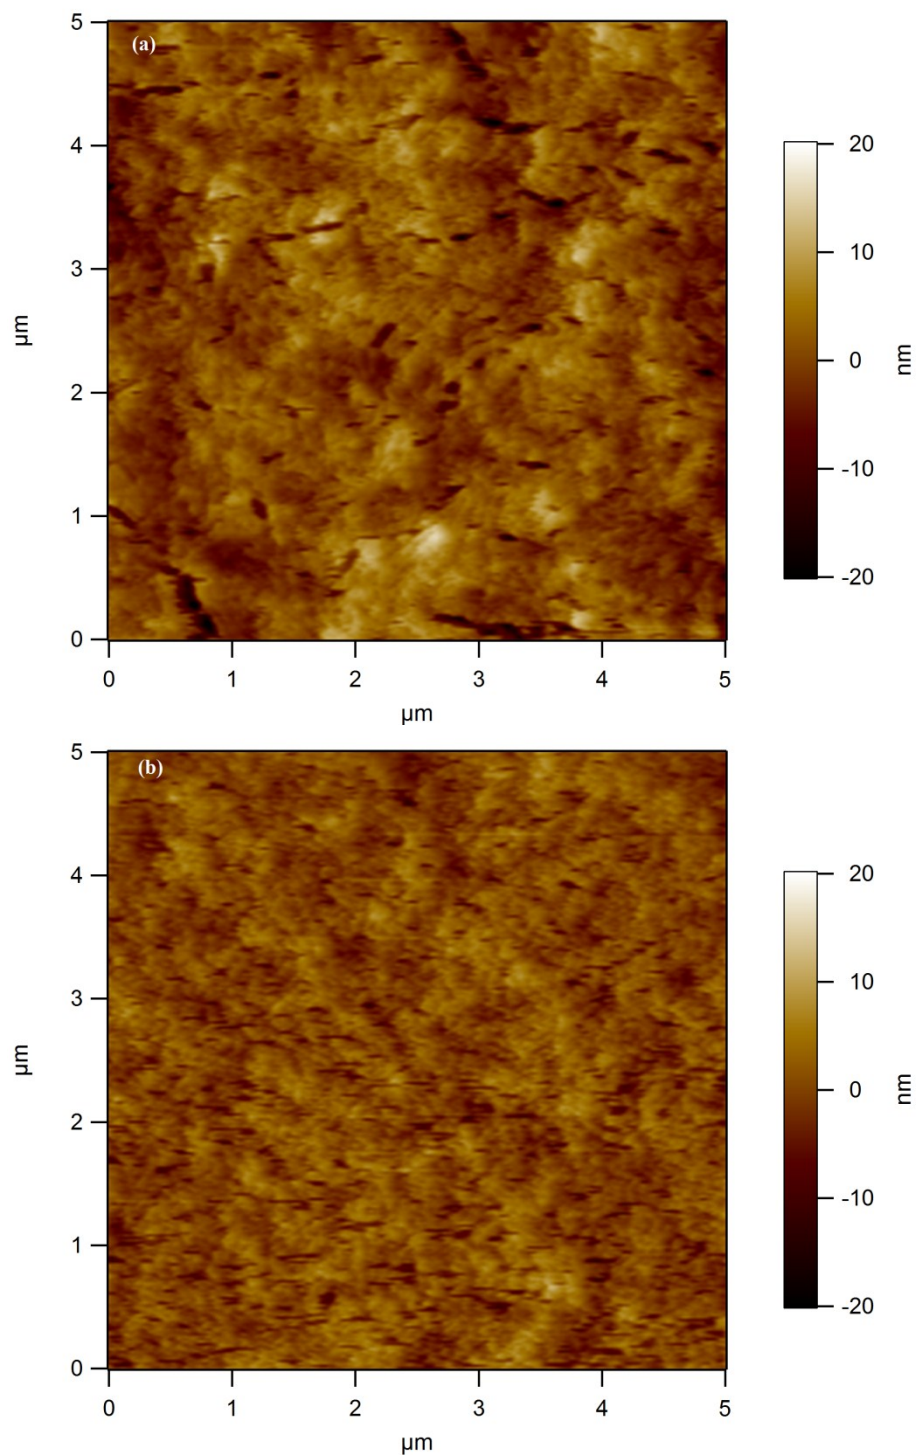

Fig. S16. AFM topography images of the PDTBDT-DTBT/PC<sub>71</sub>BM (a, without DIO, b with 3% DIO ) with weight ratio of 1:2.

17. AFM topography images of PDTBDT-DTFBT/PC<sub>71</sub>BM (a, without DIO, b with 3% DIO) with weight ratio of 1:2.

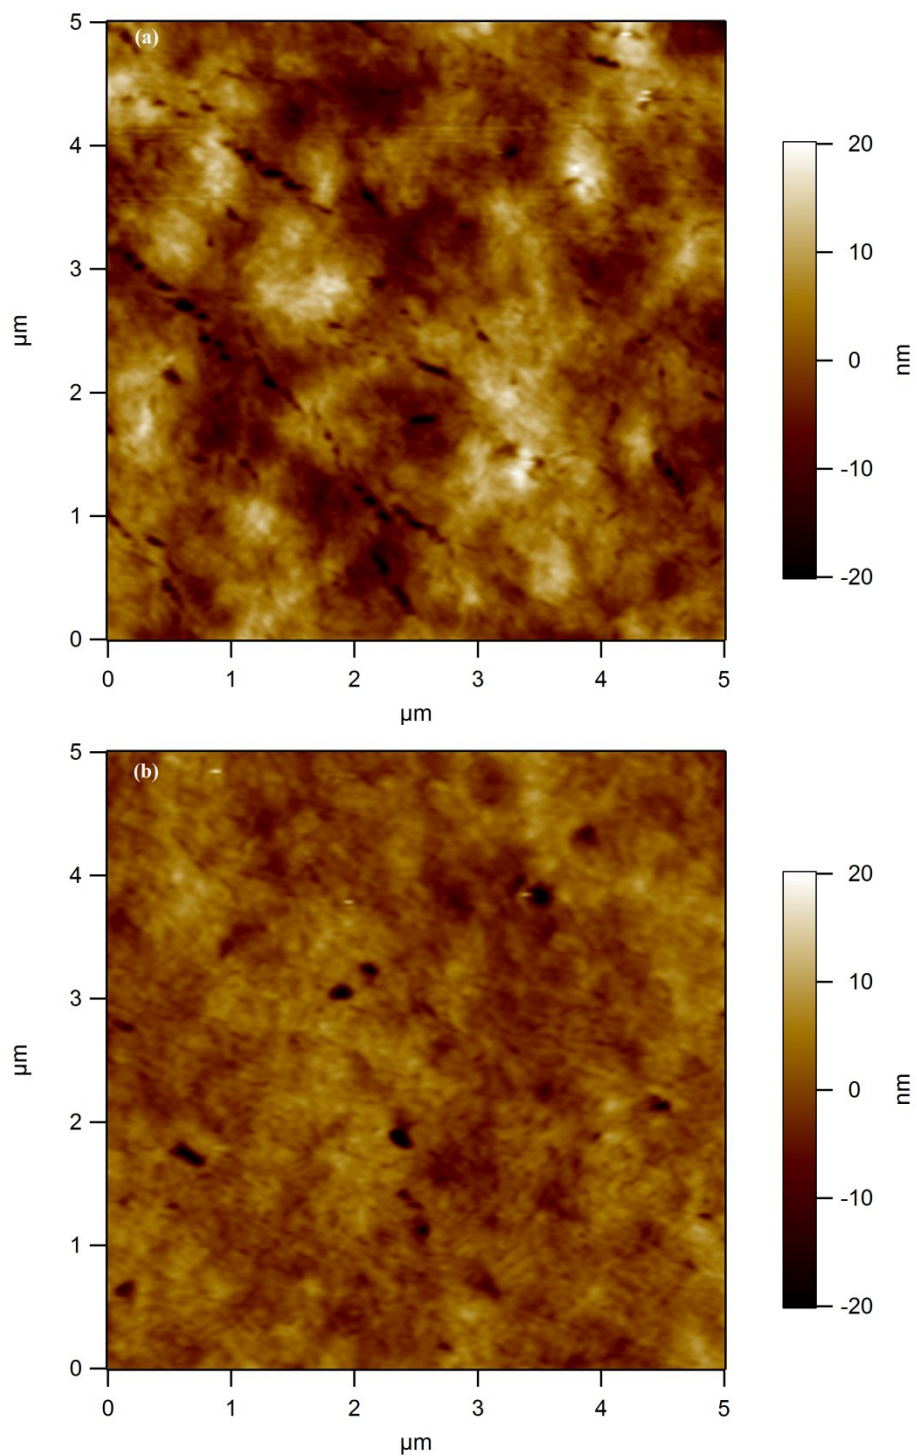

Fig. S17. AFM topography images of PDTBDT-DTFBT/PC<sub>71</sub>BM (a, without DIO, b with 3% DIO) with weight ratio of 1:2.

18. Diagram of the energy levels of the copolymers and PC<sub>71</sub>BM and calculated  $V_{oc}$  from empirical equation

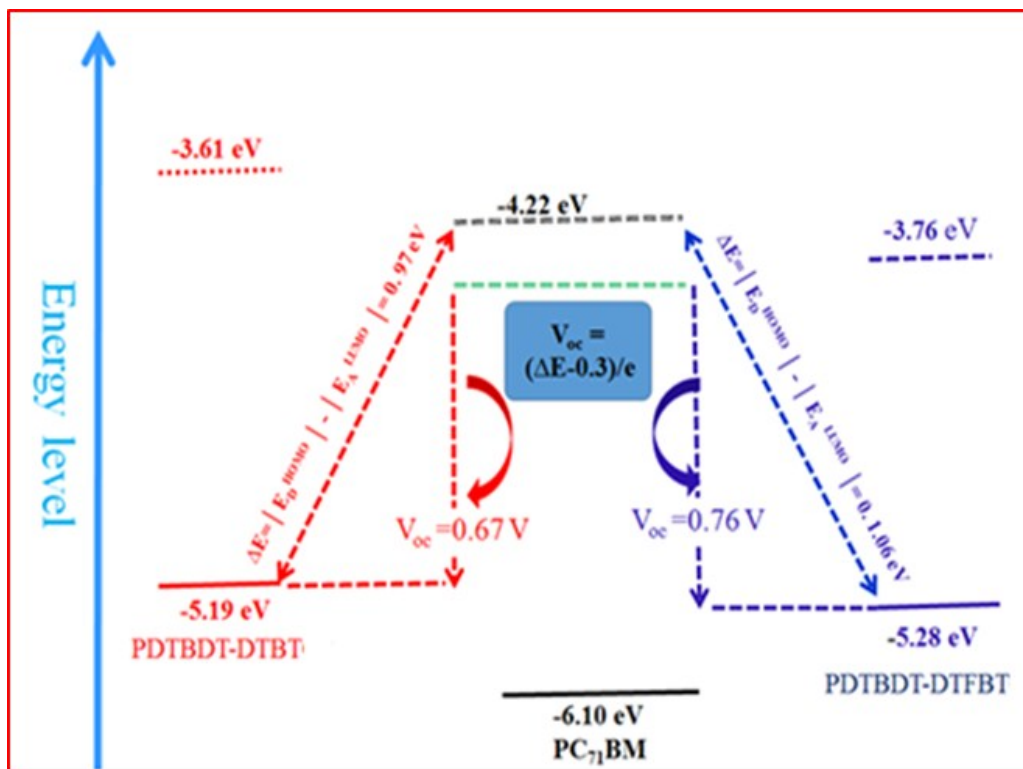

Fig. S18. Diagram of the energy levels of the copolymers and PC<sub>71</sub>BM and calculated  $V_{oc}$  from empirical equation.
